# Supplementary material for: Degradation of three β-O-4 lignin model compounds via organic electrolysis and elucidation of the degradation mechanisms
Source: Royal Society of Chemistry journal article supplement (doi:10.1039/d3ra02486e), 2023-01-01
Supplement: d3ra02486e1.pdf [file d3ra02486e1.pdf]

# Supporting Information

## Degradation of three $\beta$ -O-4 lignin model compounds via organic electrolysis and elucidation of the degradation mechanisms

Yoshiyuki Uruma<sup>1,\*</sup>, Tomohiro Yamada<sup>2</sup>, Tsubasa Kojima<sup>1</sup>, Tianyuan Zhang<sup>2</sup>,  
Chen Qu<sup>3</sup>, Moe Ishihara<sup>1</sup>, Takashi Watanabe<sup>3</sup>, Kan Wakamatsu<sup>4</sup>, and Hirofumi  
Maekawa<sup>2</sup>

<sup>1</sup>Department of Integrated Engineering, Chemistry and Biochemistry Division,  
National Institute of Technology, Yonago College, 4448, Hikona-cho, Yonago City,  
Tottori 683-8502, Japan

<sup>2</sup> Department of Materials Science and Technology, Nagaoka University of  
Technology, 1603-1, Kamitomioka-cho, Nagaoka, Niigata 940-2188, Japan

<sup>3</sup> Research Institute for Sustainable Humanosphere, Kyoto University, Gokasho,  
Uji, Kyoto 611-0011, Japan

<sup>4</sup> Department of Chemistry, Faculty of Science, Okayama University of Science, 1-  
1 Ridaicho, Kita-ku, Okayama 700-0005, Japan

\*Corresponding author: Yoshiyuki Uruma

E-mail: [uruma@yonago-k.ac.jp](mailto:uruma@yonago-k.ac.jp)

### I General Information

|                        |   |
|------------------------|---|
| .....                  | 3 |
| II Spectral Data ..... | 4 |
| Figure S1. ....        | 5 |
| Figure S2. ....        | 5 |
| Figure S3. ....        | 7 |

|                 |    |
|-----------------|----|
| Figure S4. .... | 8  |
| Figure S5. .... | 9  |
| Figure S6. .... | 10 |
| Figure S7. .... | 11 |
| Figure S8. .... | 12 |
| Figure S9. .... | 13 |
| Table S1. ....  | 6  |
| Scheme S1. .... | 6  |

## I General Information

Unless otherwise stated, Cyclic voltammetry was recorded on a ALS/CH Instruments Electrochemical Analyzer Model 600A. Calculations were carried out using the Gaussian 16 program package. The structures of closed shell species were optimized at the restricted B3LYP/6-31G(d) level, while the structures of open shell species such as **1a<sup>•+</sup>**, **2a<sup>•+</sup>**, and **3a<sup>•+</sup>** were optimized using the unrestricted theory at the same level. Frequency analysis was performed for each optimized structure to confirm that no imaginary frequency was obtained for the energy-minimum structures. These calculations were performed in MeOH solution using the polarizable continuum model (PCM).

## II. Spectral Data

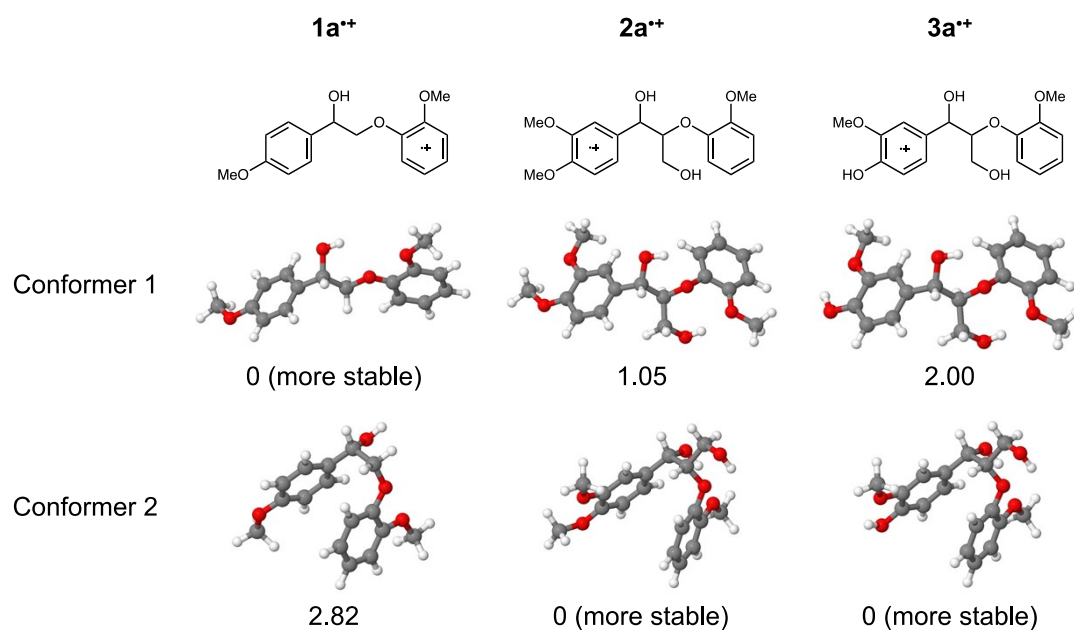

Figure S1. Optimized structures and relative free energies at 298 K between conformers ( $\Delta G_{298}$  / kcal mol<sup>-1</sup>) of the radical cations calculated at B3LYP/6-31G(d) level with PCM solvation model (in MeOH).

|             | <b>1a<sup>•+</sup></b> |                               | <b>2a<sup>•+</sup></b>        |                 | <b>3a<sup>•+</sup></b>        |                 |
|-------------|------------------------|-------------------------------|-------------------------------|-----------------|-------------------------------|-----------------|
|             |                        |                               |                               |                 |                               |                 |
| Conformer 1 | +0.05<br>(0.00)        | <b>+0.95</b><br><b>(1.00)</b> | <b>+0.96</b><br><b>(0.97)</b> | +0.04<br>(0.03) | <b>+0.95</b><br><b>(0.96)</b> | +0.05<br>(0.04) |
| Conformer 2 | +0.26<br>(0.24)        | <b>+0.74</b><br><b>(0.76)</b> | <b>+0.81</b><br><b>(0.84)</b> | +0.19<br>(0.16) | <b>+0.66</b><br><b>(0.68)</b> | +0.34<br>(0.32) |

Figure S2. Charge and spin distribution by natural population analysis in the radical cations calculated at B3LYP/6-31G(d) level with PCM solvation model (in MeOH). The values indicate the sum of atomic charges or spins in each part of the radical cations. Spin values are presented in parentheses.

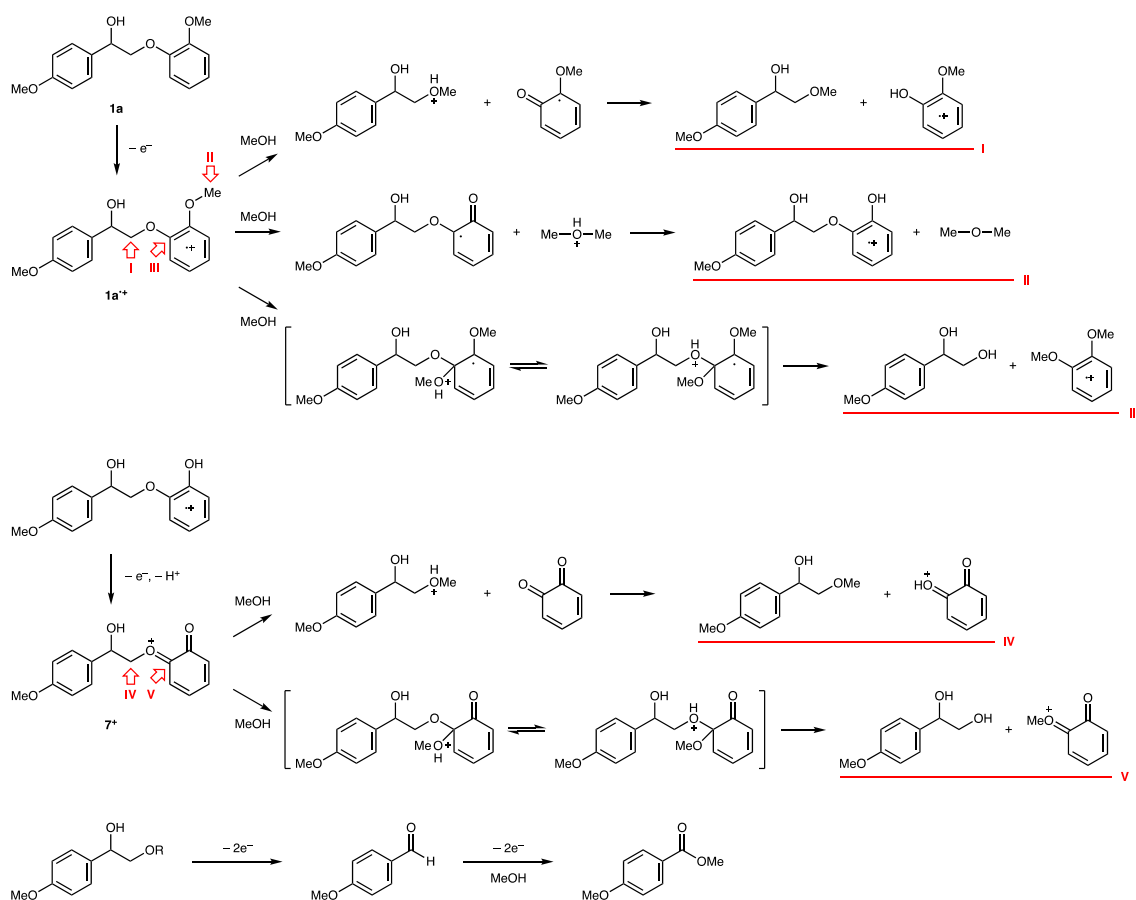

Scheme S1. The possible pathways of the decomposition from  $1a^{\bullet+}$

Table S1. Free energy changes at 298 K ( $\Delta G_{298}$  / kcal mol<sup>-1</sup>) to the products **I** – **V** indicated in Scheme S1 <sup>a</sup>

| Reaction                                             | $\Delta G_{298}$ / kcal mol <sup>-1</sup> |
|------------------------------------------------------|-------------------------------------------|
| $1a^{\bullet+} + \text{MeOH} \rightarrow \text{I}$   | -4.42                                     |
| $1a^{\bullet+} + \text{MeOH} \rightarrow \text{II}$  | -1.03                                     |
| $1a^{\bullet+} + \text{MeOH} \rightarrow \text{III}$ | +2.03                                     |
| $7^{\bullet+} + \text{MeOH} \rightarrow \text{IV}$   | -3.52                                     |
| $7^{\bullet+} + \text{MeOH} \rightarrow \text{V}$    | +1.37                                     |

<sup>a</sup> Calculated at B3LYP/6-31G(d) level with PCM solvation model (in MeOH).

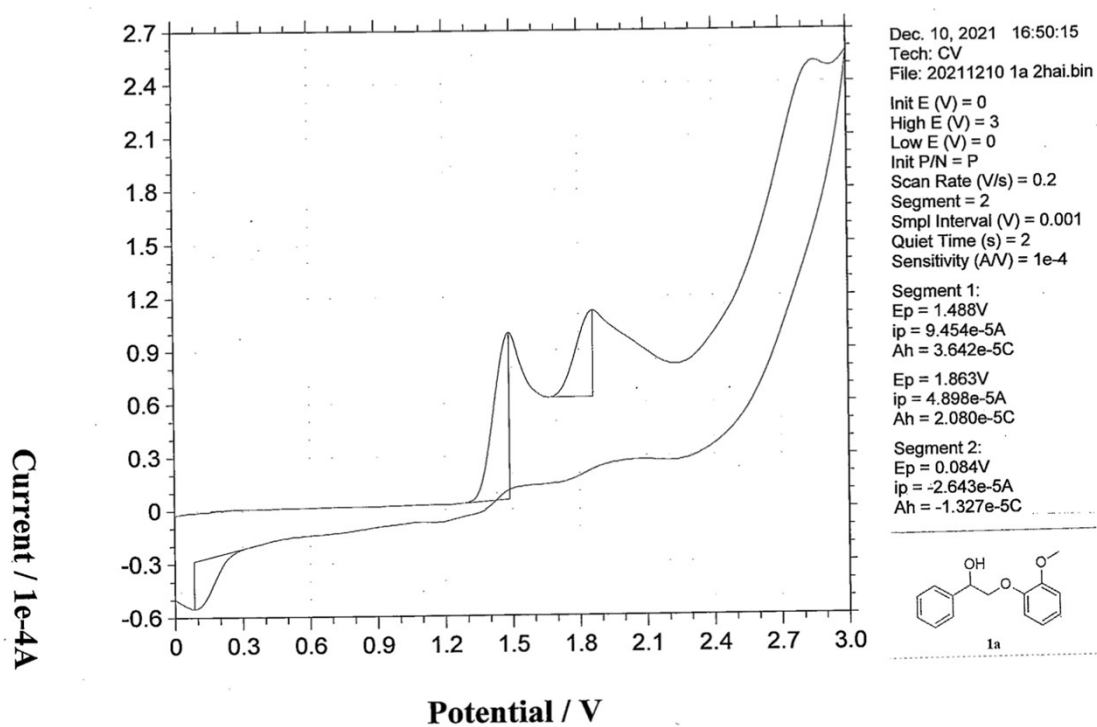

Figure S3 Cyclic voltammograms of a reference sample #1a.

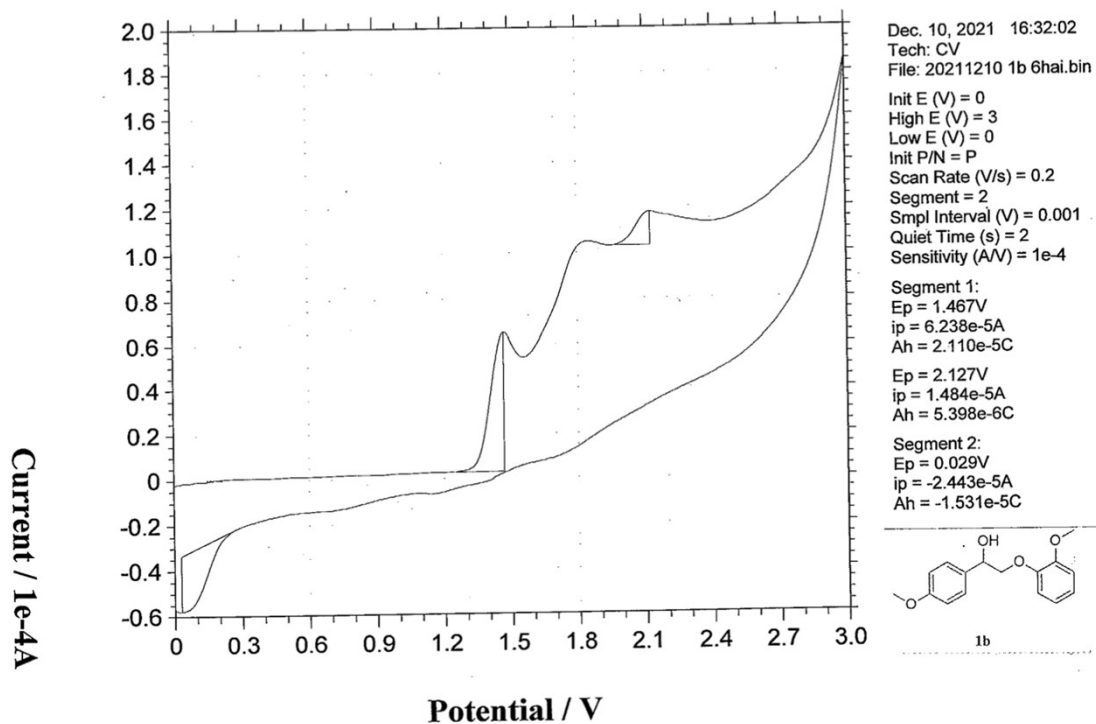

Figure S4 Cyclic voltammograms of a reference sample #1b

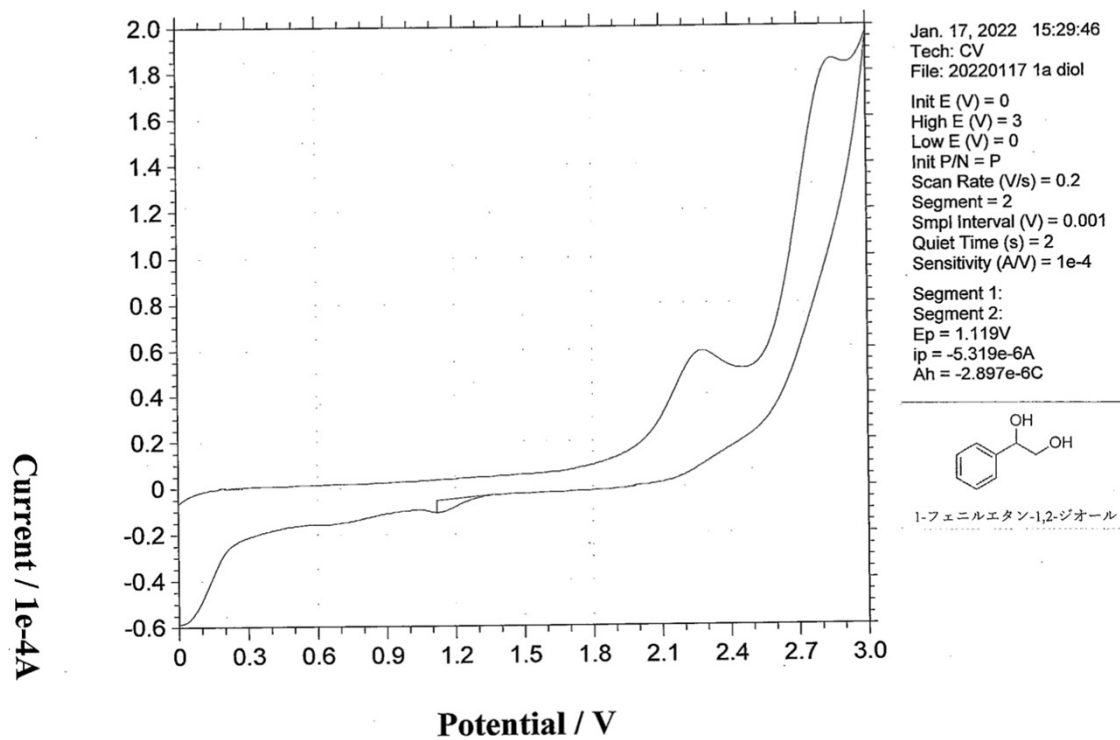

Figure S5 Cyclic voltammograms of 1-phenylethane-1,2-diol as reference sample

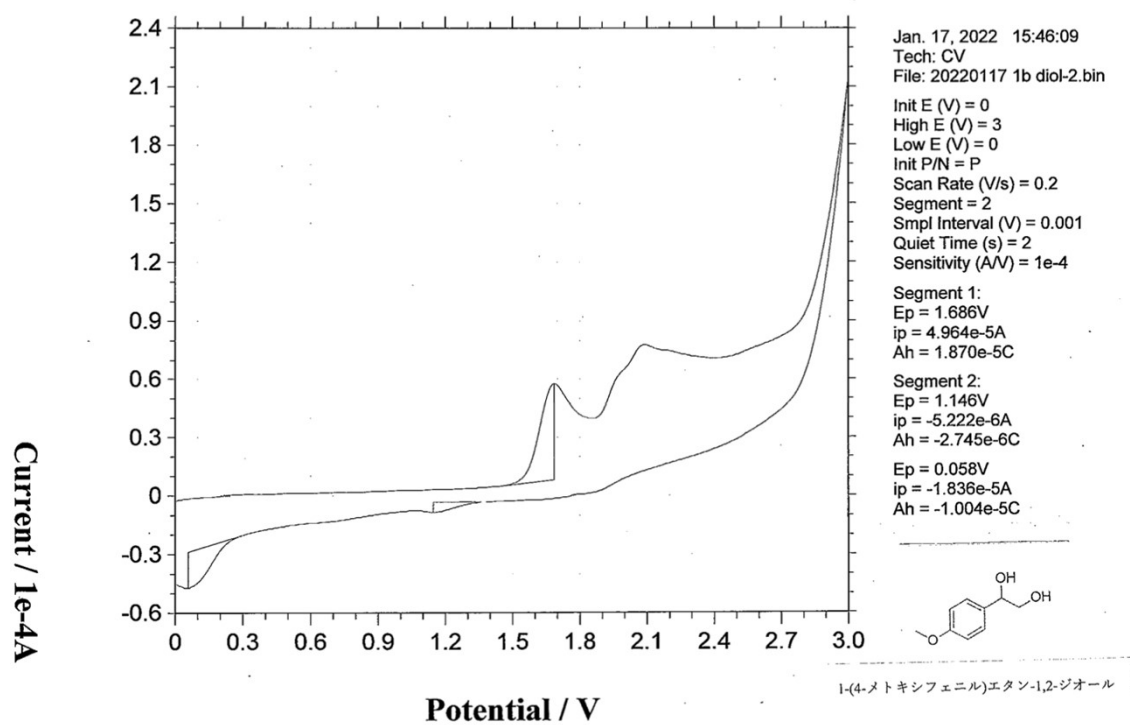

Figure S6 Cyclic voltammograms of 1-(4-methoxyphenyl)ethane-1,2-diol as reference sample

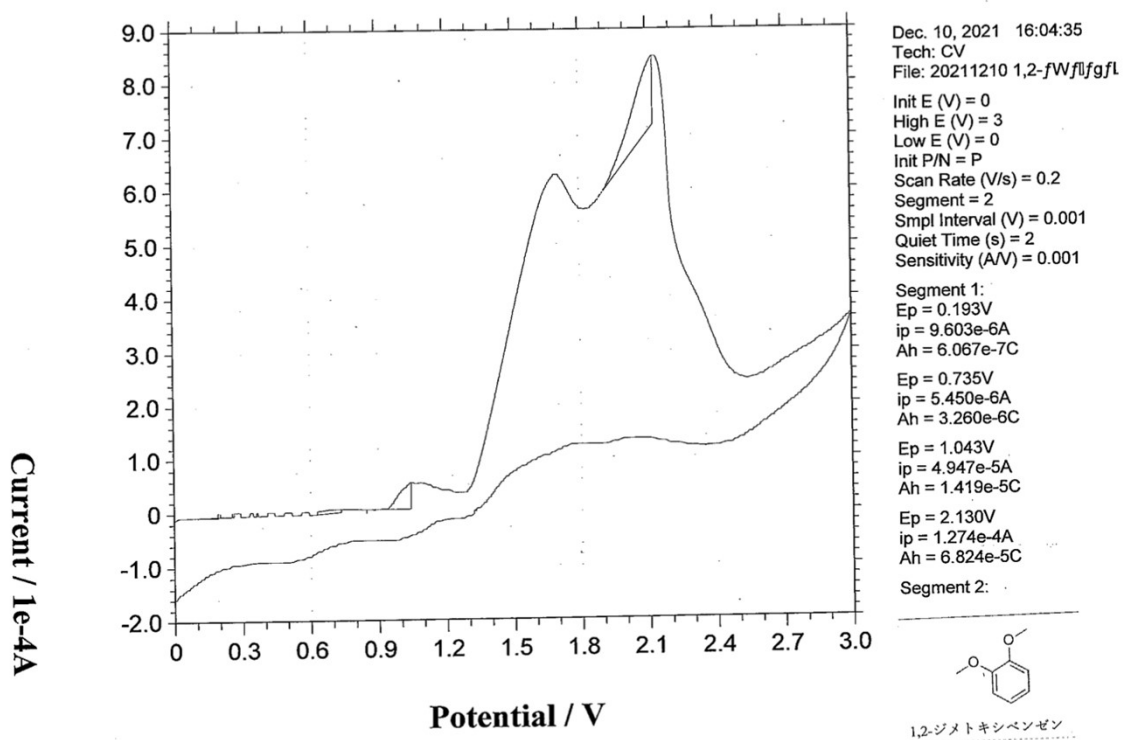

Figure S7 Cyclic voltammograms of 1,2-dimethoxybenzene as reference sample

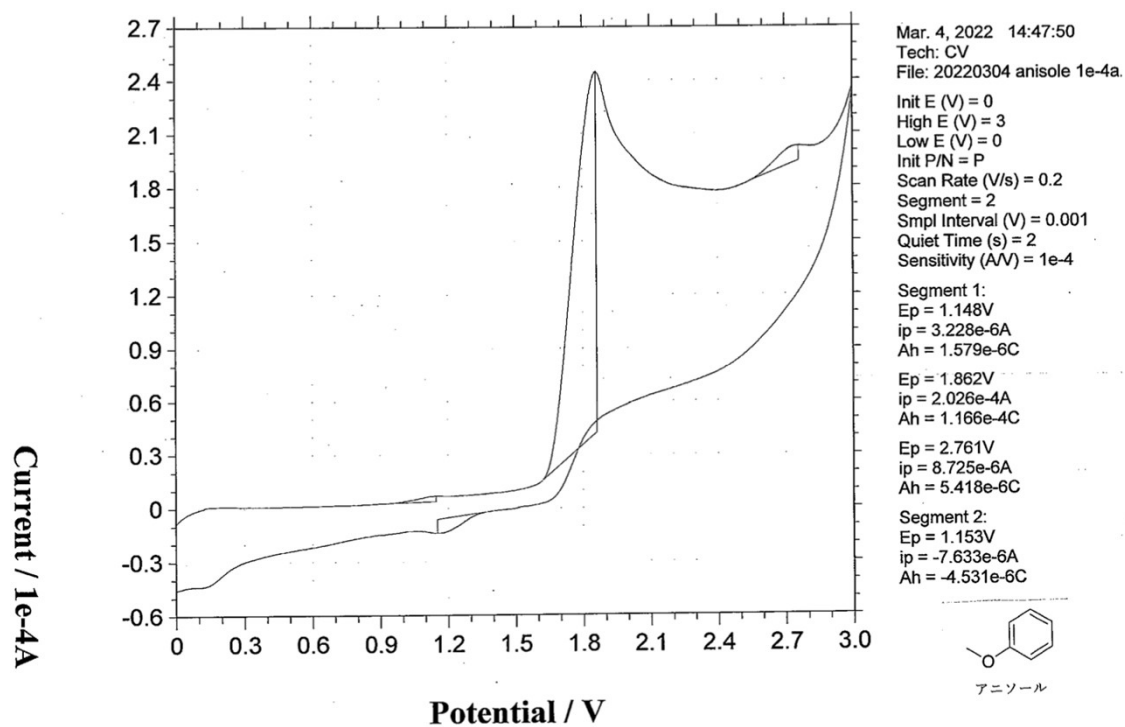

Figure S8 Cyclic voltammograms of anisole as reference sample

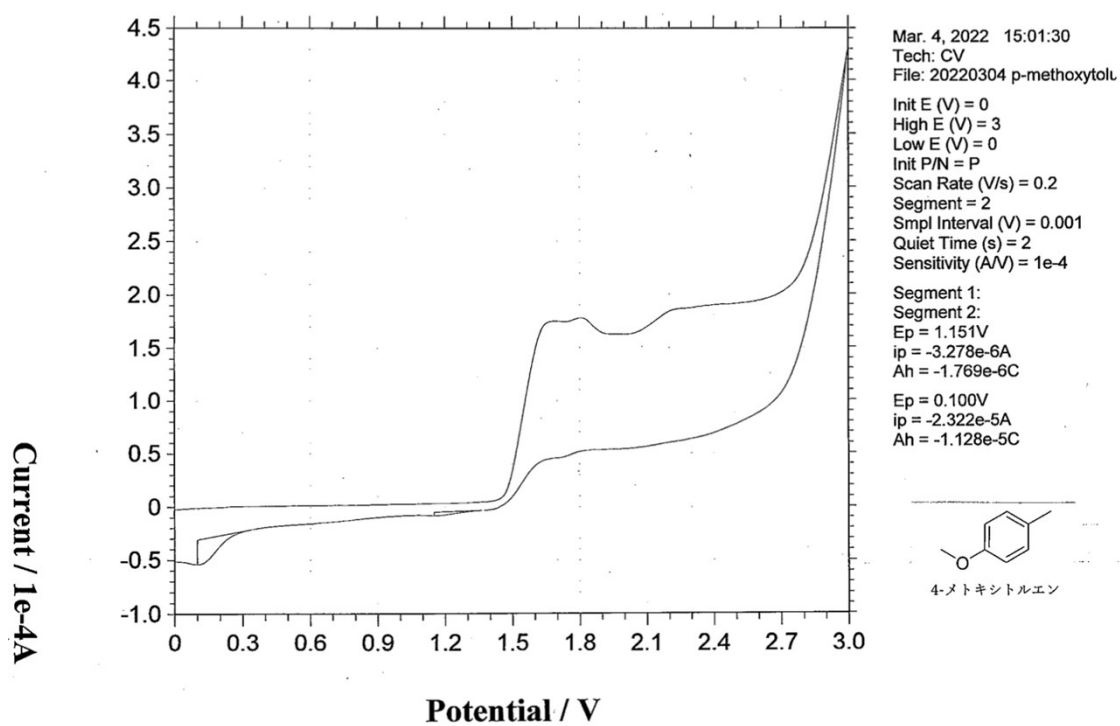

Figure S9 Cyclic voltammograms of 4-methoxytoluene as reference sample
